# Supplementary material
Source: Springer Nature journal article supplement (https://www.springermedizin.de/resource/supplementary/12985_2013_2255_MOESM3_ESM.pdf/9606342)

**A**

control      CD      Jaspla      mock

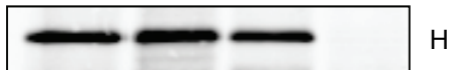

H

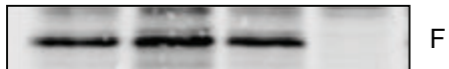

F

**B**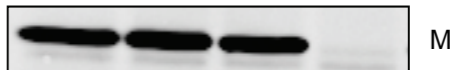

M

**C**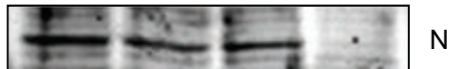

N

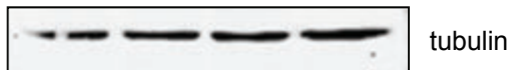

tubulin

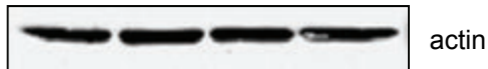

actin

Supplement: MOESM3 [file 9606342]
